# Supplementary material for: Imma perovskite-type oxynitride LaTiO2N: structure and electron density
Source: Royal Society of Chemistry journal article supplement (doi:10.1039/c0cc00573h), 2010-01-01
Supplement: c0cc00573h.pdf [file c0cc00573h.pdf]

## Supporting Information

Authors: Masatomo Yashima, Mio Saito, Hiromi Nakano, Tsuyoshi Takata, Kiyonori Ogisu, Kazunari Domen

Title: *Imma* Perovskite-Type Oxynitride LaTiO<sub>2</sub>N, Structure and Electron Density

## Contents of Supporting Information:

- (S1) **Table S1.** Space group and tolerance factor of perovskite-type oxynitride ABO<sub>2</sub>N where the *A* and *B* are larger and smaller cations, respectively.
- (S2) Details of the synthesis of high-purity and highly crystalline LaTiO<sub>2</sub>N sample.
- (S3) Infrared (IR) study of LaTiO<sub>2</sub>N (**Fig. S1**).
- (S4) TEM study of LaTiO<sub>2</sub>N (**Figs. S2 and S3**).
- (S5) **Table S2.** Crystallographic parameters and reliability factors in Rietveld and MPF analyses for the synchrotron powder diffraction data of LaTiO<sub>2</sub>N.
- (S6) SEM-EDS study of LaTiO<sub>2</sub>N (**Fig. S4**).
- (S7) **Figure S5.** Refined crystal structures projected on the (a) (101) and (b) (010) planes of *Imma* LaTiO<sub>2</sub>N with the tilt system  $a^0b^-b^-$ .
- (S8) **Figure S6.** Refined crystal structure and MEM nuclear density distribution of *Imma* LaTiO<sub>2</sub>N.
- (S9) Details of the DFT calculations and six structure models (**Fig. S7**).
- (S10) **Table S3.** Relative energies and band gap of (LaTiO<sub>2</sub>N)<sub>4</sub>.
- (S11) **Table S4.** Unit-cell and positional parameters of LaTiO<sub>2</sub>N obtained by DFT structural optimization for 4<sup>th</sup> model of (LaTiO<sub>2</sub>N)<sub>4</sub> (Fig. S7(d)) and by the *Imma* Rietveld analysis of synchrotron data (Table S2).
- (S12) **Figure S8.** Band structure of (LaTiO<sub>2</sub>N)<sub>4</sub>.

## Supporting Information

Authors: Masatomo Yashima, Mio Saito, Hiromi Nakano, Tsuyoshi Takata, Kiyonori Ogisu, Kazunari Domen

Title: Imma Perovskite-Type Oxynitride LaTiO<sub>2</sub>N, Structure and Electron Density

(S1) Table S1. Space group and tolerance factor of perovskite-type oxynitride ABO<sub>2</sub>N where the A and B are larger and smaller cations, respectively.

| Space group                          | Composition          | Tolerance factor* | Refs.            |
|--------------------------------------|----------------------|-------------------|------------------|
| <i>Imma</i><br>$P\bar{1} (I\bar{1})$ | LaTiO <sub>2</sub> N | 0.972             | This Work<br>[1] |
| <i>Pm</i> $\bar{3}m$                 | SrWO <sub>2</sub> N  | 0.993             | [2]              |
|                                      | BaTaO <sub>2</sub> N | 1.042             | [3-5]            |
|                                      | BaNbO <sub>2</sub> N | 1.042             | [3-5]            |
|                                      | EuNbO <sub>2</sub> N | 0.987             | [6]              |
| <i>Pnma</i>                          | CaTaO <sub>2</sub> N | 0.949             | [5],[9]          |
|                                      | NdTiO <sub>2</sub> N | 0.941             | [7]              |
|                                      | LaZrO <sub>2</sub> N | 0.92              | [7]              |
| <i>I4/mcm</i>                        | SrNbO <sub>2</sub> N | 0.984             | [8]              |
|                                      | SrTaO <sub>2</sub> N | 0.984             | [9]              |
| <i>C2/m</i>                          | LaTaO <sub>2</sub> N | 0.956             | [9]              |

\* Tolerance factor  $t$  of perovskite-type ABX<sub>3</sub> was calculated by the following equations,

$$t = (r_A + r_X) / \{2^{0.5}(r_B + r_X)\}$$

$$r_X = (2r_O + r_N) / 3$$

where the  $r_A$ ,  $r_B$  and  $r_X$  are ionic radii of A cation (coordination number (CN) = 12) and B cation (CN = 6) after Shannon [Ref. 10] and average ionic radius of anion X. The  $r_O$  and  $r_N$  are the ionic radii of O<sup>2-</sup> and N<sup>3-</sup> anions (CN = 4) after Shannon [Ref. 10]. Here we used the anion radii  $r_O$  and  $r_N$  for CN=4, because only for CN = 4, the  $r_N$  is tabulated in Ref. 10.

## References

- [1] D. Logvinovich, L. Bocher, D. Sheptyakov, R. Figi, S.G. Ebbinghaus, R. Aguiar, M.H. Aguirre, A. Reller, A. Weidenkaff, *Solid State Sciences* **11**, (2009) 1516.
- [2] I. D. Fawcett, K.V. Ramanujachary, M. Greenblatt, *Mater. Res. Bull.* **32**, (1997) 1565.
- [3] F. Pors, R. Marchand, Y. Laurent, P. Batcher, G. Rault, *Mater. Res. Bull.* **23**, (1988) 1447.
- [4] R. Marchand, F. Pors, Y. Laurent, *Rev. Int. Hautes Tempér. Réfract. Fr.* **23**, (1986) 11.
- [5] A. Rachel, S. G. Ebbinghaus, M. Güngerich, P. J. Klar, J. Hanss, A. Weidenkaff, A. Reller, *Thermochimica Acta* **438**, (2005) 139.
- [6] E. C. Pascual, V.B. Gutierrez, M. Subda, R. Saez-Puche, *Solid State Sciences* **10**, (2008) 1907.
- [7] S. J. Clarke, B. P. Guinot, C. W. Michie, M. J. C. Calmont, M. J. Rosseinsky, *Chem. Mater.* **14**, (2002) 288.
- [8] S. G. Ebbinghaus, A. Weidenkaff, A. Rachela, A. Reller, *Acta Crystallogr. C* **60**, (2004) i91.
- [9] E. Gunther, R. Hagenmayer, M. Jansen, *Z. Anorg. Allg. Chem.* **626**, (2000) 1519.
- [10] R. D. Shannon, *Acta Crystallogr. A* **32**, (1976) 751.

### Supporting Information

Authors: Masatomo Yashima, Mio Saito, Hiromi Nakano, Tsuyoshi Takata, Kiyonori Ogisu, Kazunari Domen

Title: Imma Perovskite-Type Oxynitride LaTiO<sub>2</sub>N, Structure and Electron Density

#### (S2) Details of the synthesis of high-purity and highly crystalline LaTiO<sub>2</sub>N sample.

A highly crystalline and high-purity LaTiO<sub>2</sub>N sample was synthesized from the corresponding oxide precursor by ammonolysis. La(NO<sub>3</sub>)<sub>3</sub>·6H<sub>2</sub>O and TiO<sub>2</sub> (P-25) with a molar ratio of La: Ti = 1 : 1 were mixed and ground quickly in an agate mortar. Then, the mixture was heated in air at 500 °C for 10 min to obtain a mixed oxide precursor. The precursor was heated under dry NH<sub>3</sub> flow of 200 mL min<sup>-1</sup> at 900 °C for 20 h with intermediate grinding. A NaCl flux was added to the obtained sample (Molar ratio, Na : La = 1 : 1), and then mixed and ground in an agate mortar. Then, the mixture was heated under dry NH<sub>3</sub> flow of 100 mL min<sup>-1</sup> at 900 °C for 10 h. The process of NaCl addition, mixing, grinding and heating was repeated twice. The final products were washed with distilled water to remove residual flux. The SEM-EDS indicated no Na in the final product, LaTiO<sub>2</sub>N.

#### (S3) Infrared (IR) study of LaTiO<sub>2</sub>N (Fig. S1).

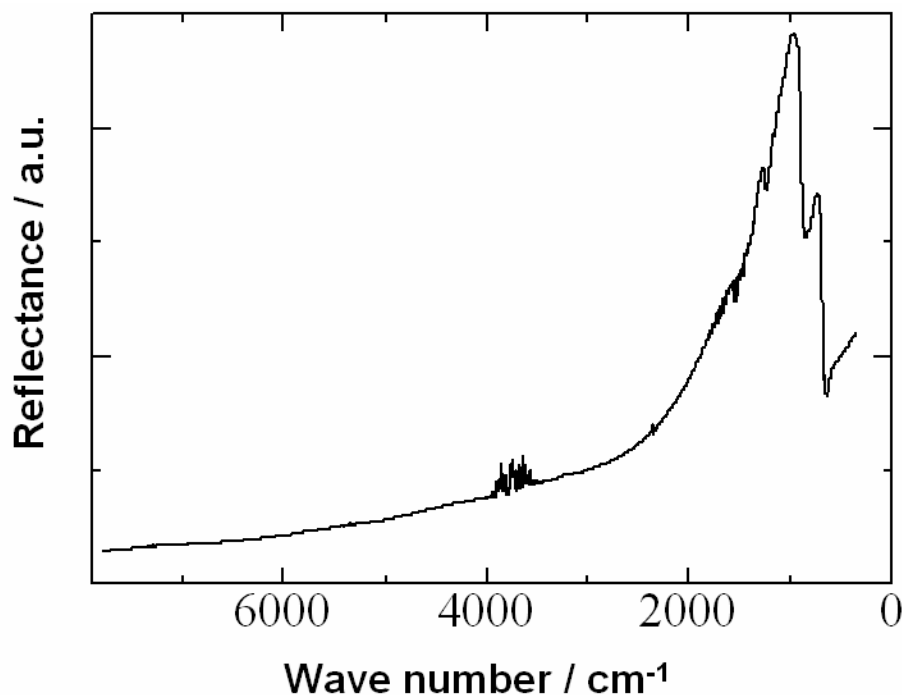

**Figure S1:** Infrared (IR) reflectance spectra of LaTiO<sub>2</sub>N dispersed on a Ti metal substrate (JASCO FT/IR-6200), which were measured to investigate whether the possible OH and NH<sub>4</sub> species exist or not. The IR spectra indicated neither OH (around 3600 cm<sup>-1</sup>) nor NH<sub>4</sub> species (around 3100 cm<sup>-1</sup>).

**Supporting Information**

**Authors: Masatomo Yashima, Mio Saito, Hiromi Nakano, Tsuyoshi Takata, Kiyonori Ogisu, Kazunari Domen**

**Title: Imma Perovskite-Type Oxynitride LaTiO<sub>2</sub>N, Structure and Electron Density**

**(S4) TEM study of LaTiO<sub>2</sub>N (Figs. S2 and S3).**

We investigated electron-diffraction patterns of about 10 crystallites and obtained the identical patterns and symmetry for all the crystallites.

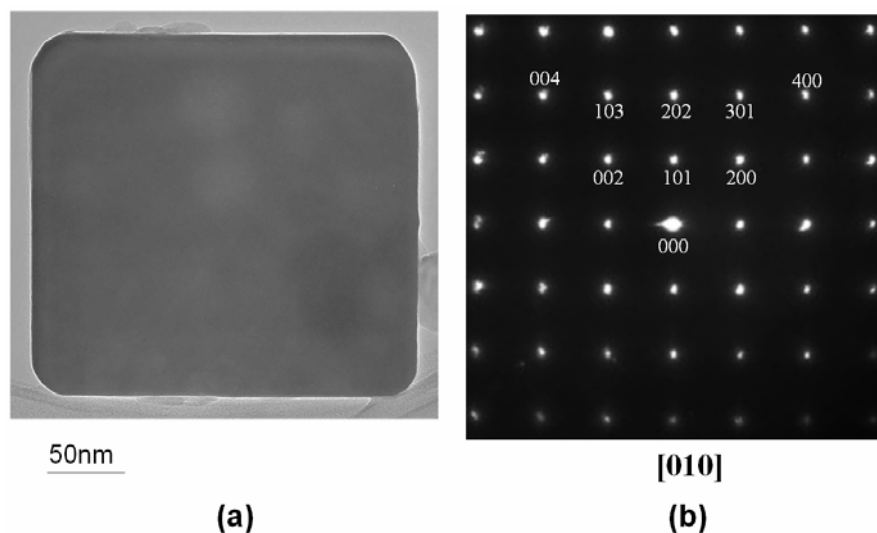

**Figure S2.** (a) Bright field image and (b) selected area electron diffraction (SAED) pattern of the  $[010]_{\text{ortho}}$  zone axis for highly crystalline LaTiO<sub>2</sub>N. SAED pattern indicates the reflection condition,  $h0l$ :  $h+l = \text{even}$ . The particle was single crystal with the rectangular shape. No twins were observed. TEM-EDS measurements of this particle indicated the composition La : Ti : O : N = 1.00 : 1.00 : 2 : 1. The TEM observations indicated that the crystallite sizes were ranged from 50 nm to 500 nm.

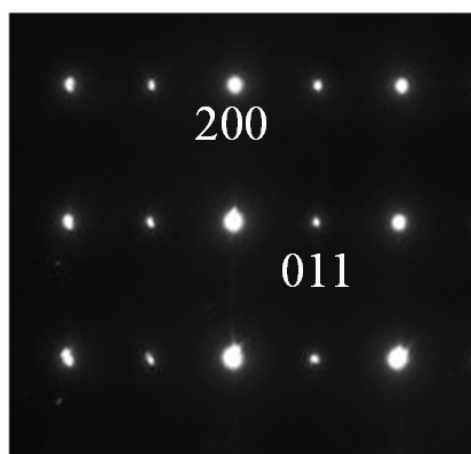

**Figure S3.** Selected area electron diffraction (SAED) pattern of the  $[01-1]_{\text{ortho}}$  zone axis for highly crystalline LaTiO<sub>2</sub>N. SAED pattern indicates the reflection condition,  $h00$ :  $h = \text{even}$  and  $0kl$ :  $k+l = \text{even}$ .

**Supporting Information****Authors: Masatomo Yashima, Mio Saito, Hiromi Nakano, Tsuyoshi Takata, Kiyonori Ogisu, Kazunari Domen****Title: Imma Perovskite-Type Oxynitride LaTiO<sub>2</sub>N, Structure and Electron Density**

(S5) **Table S2.** Crystallographic parameters and reliability factors in Rietveld and MPF analyses for the synchrotron powder diffraction data of LaTiO<sub>2</sub>N.\*

| Atom | Site       | <i>g</i>   | <i>x</i> | <i>y</i>        | <i>z</i>        | <i>U</i> (Å <sup>2</sup> ) |
|------|------------|------------|----------|-----------------|-----------------|----------------------------|
| La   | 4 <i>e</i> | 1.0000(17) | 0        | 1/4             | 1.0010(5)       | 0.01221(5)                 |
| Ti   | 4 <i>b</i> | 1          | 0        | 0               | 1/2             | 0.00412(13)                |
| O1   | 4 <i>e</i> | 0.67(8)    | 0        | 1/4             | 0.551(2)        | 0.0124(10)                 |
| N1   | 4 <i>e</i> | 0.33(8)**  | 0        | 1/4             | = <i>x</i> (O1) | = <i>U</i> (O1)            |
| O2   | 8 <i>g</i> | 0.67(4)    | 1/4      | 0.0325(9)       | 1/4             | = <i>U</i> (O1)            |
| N2   | 8 <i>g</i> | 0.33(4)**  | 1/4      | = <i>y</i> (O2) | 1/4             | = <i>U</i> (O1)            |

\*Crystal symmetry: Orthorhombic; Space group: *Imma*; Unit-cell parameters: *a* = 5.57137 (17), *b* = 7.8790(2), *c* = 5.60279(11) Å,  $\alpha = \beta = \gamma = 90^\circ$ ; Reliability factors in Rietveld analysis:  $R_{wp} = 2.87\%$ ,  $R_I = 0.49\%$ ,  $R_F = 0.43\%$ , *S* = 1.43; Reliability factors in 1<sup>st</sup> MPF analysis:  $R_{wp} = 2.87\%$ ,  $R_I = 0.41\%$ ,  $R_F = 0.38\%$ , *S* = 1.44. The decrease of  $R_I$  and  $R_F$  from the Rietveld analysis to MPF one indicates the validity of the MEM electron density.

\*\* Refinements of occupancy factors: *g*(*X*): Occupancy factor of *X* atom. The occupancy factors at the anion sites were refined with the linear constraints  $g(\text{O1}) + g(\text{N1}) = 1$  and  $g(\text{O2}) + g(\text{N2}) = 1$ .

### Supporting Information

Authors: Masatomo Yashima, Mio Saito, Hiromi Nakano, Tsuyoshi Takata, Kiyonori Ogisu, Kazunari Domen

Title: Imma Perovskite-Type Oxynitride  $\text{LaTiO}_2\text{N}$ , Structure and Electron Density

#### (S6) SEM-EDS study of $\text{LaTiO}_2\text{N}$ (Fig. S4).

To investigate the chemical composition and its homogeneity in  $\text{LaTiO}_2\text{N}$ , EDS spectra were measured for 15 particles (SEM-EDS, 10 kV, 20  $\mu\text{A}$ , SU8000/Hitachi, Horiba X-max). Figure S4 shows an example of SEM photograph with the region for an EDS measurement. The chemical composition was calibrated using the standard materials BN,  $\text{SiO}_2$ , and  $\text{LaB}_6$ . The average chemical composition for fifteen particles was  $\text{La}_{1.3(2)}\text{Ti}_{1.0(1)}\text{O}_{2.1(5)}\text{N}_{0.64(23)}$  where the number in the parenthesis denotes the standard deviation  $\sigma$  in the last digit. Thus, the average chemical composition  $\text{La}_{1.3(2)}\text{Ti}_{1.0(1)}\text{O}_{2.1(5)}\text{N}_{0.64(23)}$  agrees with the nominal one  $\text{LaTiO}_2\text{N}$  within  $\pm 3\sigma$ .

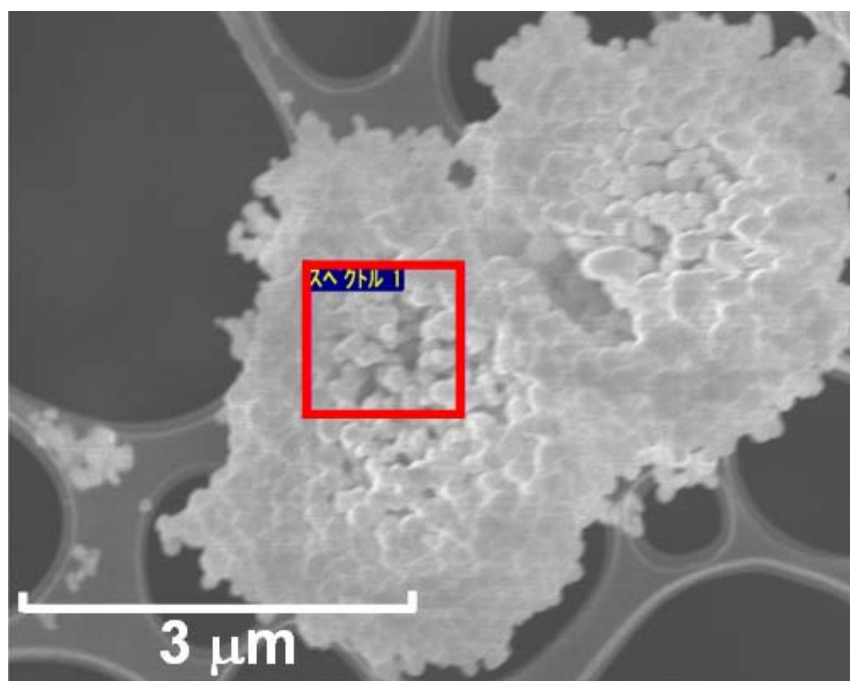

**Figure S4:** SEM image of  $\text{LaTiO}_2\text{N}$ . The chemical composition through the EDS measurement from the square region was La: 26.84 atomic%, Ti: 21.91 atomic%, O: 38.76 atomic%, N: 12.49 atomic%.

Supporting Information

Authors: Masatomo Yashima, Mio Saito, Hiromi Nakano, Tsuyoshi Takata, Kiyonori Ogisu, Kazunari Domen

Title: *Imma* Perovskite-Type Oxynitride LaTiO<sub>2</sub>N, Structure and Electron Density

(S7) Figure S5. Refined crystal structures projected on the (a) (101) and (b) (010) planes of *Imma* LaTiO<sub>2</sub>N with the tilt system  $a^0b\bar{b}$ .

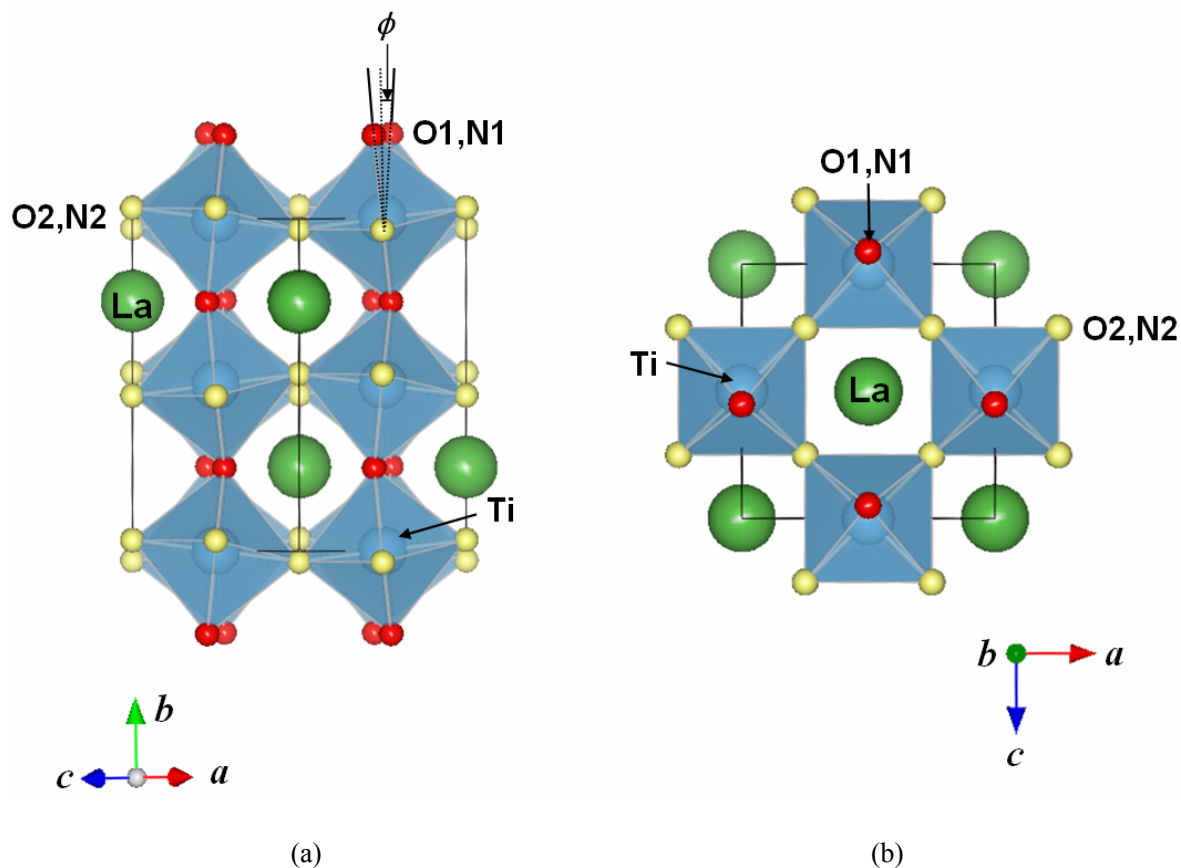

**Figure S5.** Refined crystal structures projected on the (a) (101) and (b) (010) planes of *Imma* LaTiO<sub>2</sub>N with the tilt system  $a^0b\bar{b}$ . Fig. S5(a) indicates the anti-phase tilting, while Fig. S5(b) shows no tilting. The anti-phase tilt angle  $\phi$  in Fig. S5(a) was estimated to be  $\phi = 10.404(5)^\circ$ .

Supporting Information

Authors: Masatomo Yashima, Mio Saito, Hiromi Nakano, Tsuyoshi Takata, Kiyonori Ogisu, Kazunari Domen

Title: *Imma* Perovskite-Type Oxynitride LaTiO<sub>2</sub>N, Structure and Electron Density

(S8) Figure S6. Refined crystal structure and MEM nuclear density distribution of *Imma* LaTiO<sub>2</sub>N.

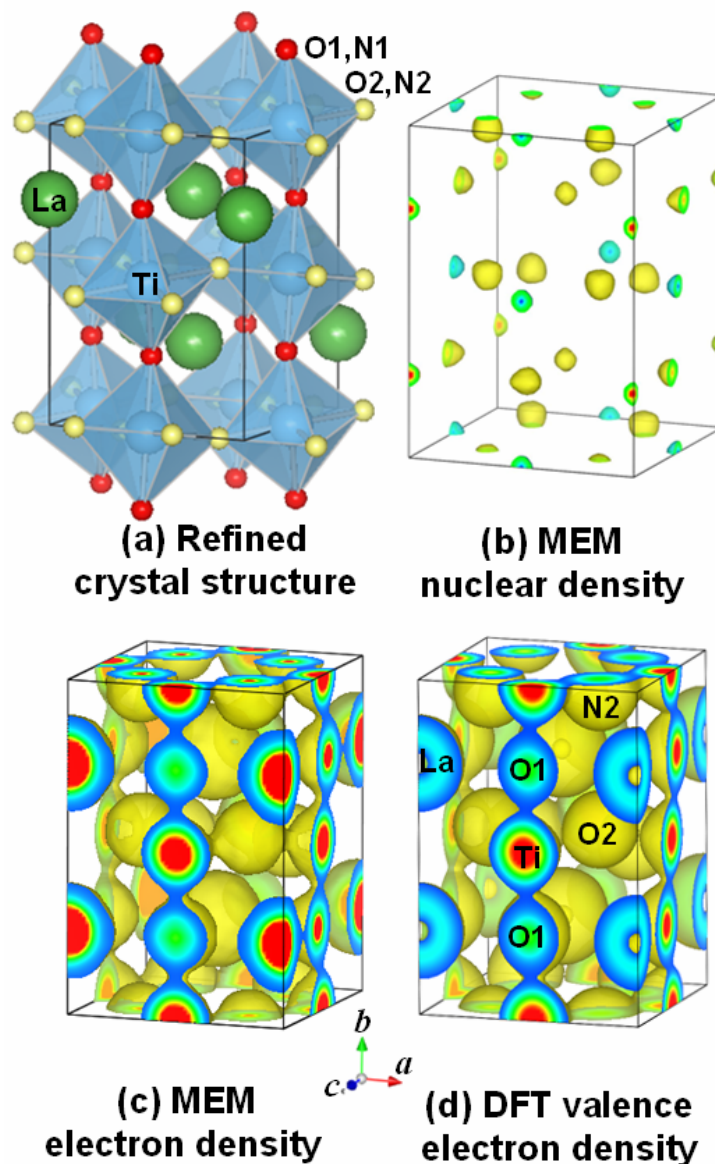

**Figure S6.** (a) Refined crystal structure, (b) isosurface of MEM nuclear density at  $3 \text{ fm } \text{\AA}^{-3}$ , (c) isosurface of MEM electron density at  $0.5 \text{ \AA}^{-3}$ , and (d) isosurface of DFT valence electron density at  $0.5 \text{ \AA}^{-3}$  (4<sup>th</sup> model in Fig. S7(d)). The nuclear density is localized at around the center of atoms, while the electron density is largely distributed forming the Ti-(O,N) covalent bonds. No nuclear density due to other species such as OH and NH<sub>4</sub> was observed in Fig. S6(b).



## Supporting Information

Authors: Masatomo Yashima, Mio Saito, Hiromi Nakano, Tsuyoshi Takata, Kiyonori Ogisu, Kazunari Domen

Title: *Imma* Perovskite-Type Oxynitride  $\text{LaTiO}_2\text{N}$ , Structure and Electron Density

### (S9) Details of the DFT calculations and six structure models (Fig. S7).

The spin-polarized generalized gradient approximation (GGA) electronic calculations were performed with Vienna *Ab initio* Simulation Package (VASP),<sup>1</sup> in order to obtain the valence electron-density distribution, density of states, and band structure in  $(\text{LaTiO}_2\text{N})_4$ . Calculations were performed using projector augmented-wave (PAW) potentials for La, Ti, N, and O atoms.<sup>2</sup> A plane-wave basis set with a cutoff of 500 eV was used. The Perdew-Burke-Ernzerhof (PBE) GGA was employed for the exchange and correlation functionals. Sums over occupied electronic states were performed using the Monkhorst-Pack scheme<sup>3</sup> on a  $3 \times 3 \times 3$  set of a  $k$ -point mesh. Unit-cell parameters and atomic coordinates of  $(\text{LaTiO}_2\text{N})_4$  were optimized with the convergence condition of 0.01 eV/Å. Initial crystallographic parameters used in the optimizations were referred from the present Rietveld analysis for *Imma* and  $R\bar{3}c$ , and from the literature for  $P\bar{1}$ .<sup>4</sup>

#### References

- 1 G. Kresse, D. Joubert, *Phys. Rev. B* **59**, (1999) 1758.
- 2 J. Perdew, K. Burke, M. Ernzerhof, *Phys. Rev. Lett.* **77**, (1996) 3865.
- 3 H. J. Monkhorst, J. D. Pack, *Phys. Rev. B* **13**, (1976) 5188.
- 4 S. J. Clarke, B. P. Guinot, C. W. Michie, M. J. C. Calmont, M. J. Rosseinsky, *Chem. Mater.* **14**, (2002) 288.

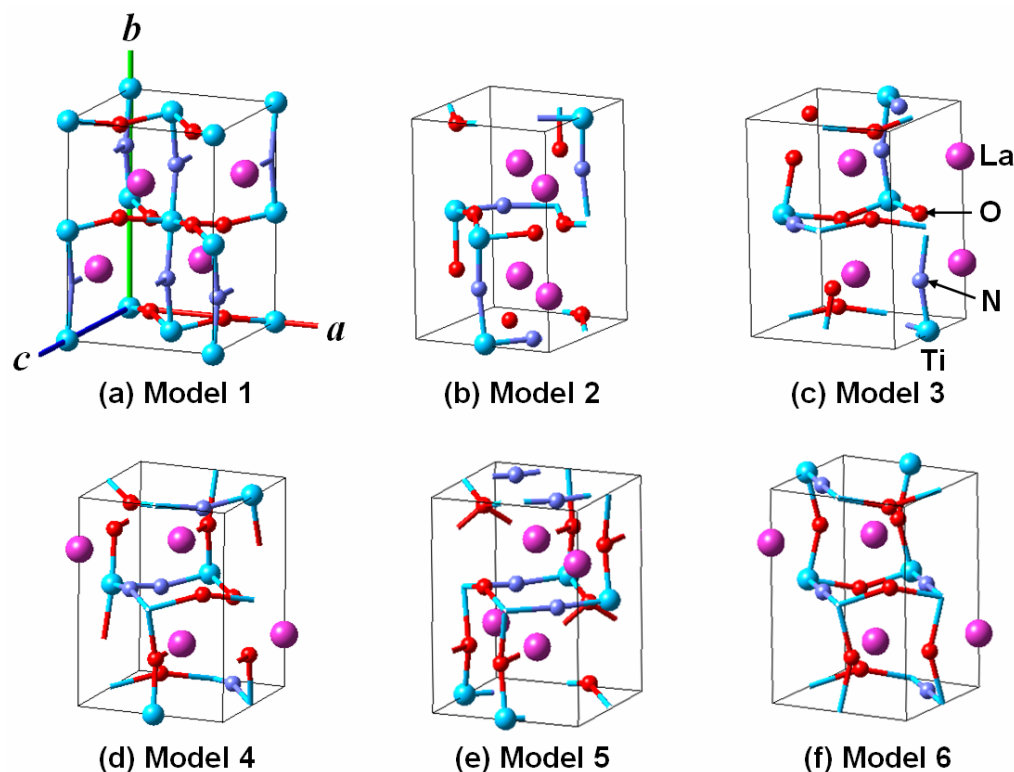

**Figure S7.** Six optimized *Imma* structure models of N and O atomic arrangements around a Ti atom in  $(\text{LaTiO}_2\text{N})_4$ .

**Supporting Information****Authors: Masatomo Yashima, Mio Saito, Hiromi Nakano, Tsuyoshi Takata, Kiyonori Ogisu, Kazunari Domen****Title: Imma Perovskite-Type Oxynitride LaTiO<sub>2</sub>N, Structure and Electron Density****(S10) Table S3. Relative energies and band gap of (LaTiO<sub>2</sub>N)<sub>4</sub>.\***

| Model** | Relative energy / atom (meV) |            |             | Band gap [eV] |            |             |
|---------|------------------------------|------------|-------------|---------------|------------|-------------|
|         | <i>Imma</i>                  | $P\bar{1}$ | $R\bar{3}c$ | <i>Imma</i>   | $P\bar{1}$ | $R\bar{3}c$ |
| 1       | 16                           | 10         | 22          | 0.94          | 1.26       | 0.88        |
| 2       | 0                            | 1          | 19          | 1.43          | 1.25       | 1.52        |
| 3       | 0                            | 1          | 19          | 1.51          | 1.37       | 1.42        |
| 4       | 1.5                          | 2          | -           | 1.30          | 1.53       | -           |
| 5       | 8                            | 9          | -           | 0.97          | 1.20       | -           |
| 6       | 8                            | 10         | -           | 0.83          | 1.29       | -           |

\* Six structural models of O and N atoms around a Ti atom in Fig. S7 were investigated. The calculations in the *Imma* and  $R\bar{3}c$  columns were done using the initial crystallographic parameters obtained by the Rietveld analysis of the synchrotron powder diffraction data in this study. The calculations in the  $P\bar{1}$  columns were performed using the initial crystallographic parameters reported in the literature (Ref. 1). Since the energy difference less than 10 meV/atom is negligible, the *Imma* and  $P\bar{1}$  structure models of 2, 3 and 4 are regarded as ground states. Since the positional parameters of 4<sup>th</sup> *Imma* model (Fig. S7(d)) exhibited best agreements with the refined ones from the synchrotron data, we showed the results of the 4<sup>th</sup> model in Figs. 2c, 3c, 4c and 5, Table S4 and Fig. S8.

\*\* See Figs. S7(a), (b), (c), (d), (e) and (f) for the structural models 1, 2, 3, 4, 5 and 6, respectively.

Ref. 1: S. J. Clarke, B. P. Guinot, C. W. Michie, M. J. C. Calmont, M. J. Rosseinsky, *Chem. Mater.* **14**, (2002) 288.

**Supporting Information****Authors: Masatomo Yashima, Mio Saito, Hiromi Nakano, Tsuyoshi Takata, Kiyonori Ogisu, Kazunari Domen****Title: Imma Perovskite-Type Oxynitride LaTiO<sub>2</sub>N, Structure and Electron Density**

**(S11) Table S4. Unit-cell and positional parameters of LaTiO<sub>2</sub>N obtained by DFT structural optimization for 4<sup>th</sup> model of (LaTiO<sub>2</sub>N)<sub>4</sub> (Fig. S7(d)) and by the *Imma* Rietveld analysis of synchrotron data (Table S2). Theoretical and experimental values agree well with each other.**

|                |          | Theoretical (4 <sup>th</sup> model) |          |          | Experimental (Table S2) |          |  |
|----------------|----------|-------------------------------------|----------|----------|-------------------------|----------|--|
| <i>a</i> (Å)   |          | 5.647495                            |          |          | 5.5713(2)               |          |  |
| <i>b</i> (Å)   |          | 7.827490                            |          |          | 7.8790(3)               |          |  |
| <i>c</i> (Å)   |          | 5.660266                            |          |          | 5.6027(2)               |          |  |
| $\alpha$ (deg) |          | 90.0                                |          |          | 90.0                    |          |  |
| $\beta$ (deg)  |          | 90.0                                |          |          | 90.0                    |          |  |
| $\gamma$ (deg) |          | 90.0                                |          |          | 90.0                    |          |  |
| Atom           |          |                                     |          |          |                         |          |  |
| Coordinates    | <i>x</i> | <i>y</i>                            | <i>z</i> | <i>x</i> | <i>y</i>                | <i>z</i> |  |
| La1            | 0.00000  | 0.25000                             | 0.00940  | 0.00000  | 0.25000                 | 0.00103  |  |
| La2            | 0.00000  | 0.75000                             | 0.99060  | 0.00000  | 0.75000                 | 0.99897  |  |
| La3            | 0.50000  | 0.75000                             | 0.50940  | 0.50000  | 0.75000                 | 0.50103  |  |
| La4            | 0.50000  | 0.25000                             | 0.49060  | 0.50000  | 0.25000                 | 0.49897  |  |
| Ti1            | 0.97970  | 0.00000                             | 0.50000  | 1.00000  | 0.00000                 | 0.50000  |  |
| Ti2            | 0.02030  | 0.50000                             | 0.50000  | 0.00000  | 0.50000                 | 0.50000  |  |
| Ti3            | 0.47970  | 0.50000                             | 0.00000  | 0.50000  | 0.50000                 | 0.00000  |  |
| Ti4            | 0.52030  | 0.00000                             | 0.00000  | 0.50000  | 0.00000                 | 0.00000  |  |
| O1             | 0.00000  | 0.25000                             | 0.57870  | 0.00000  | 0.25000                 | 0.55066  |  |
| O2             | 0.50000  | 0.75000                             | 0.07870  | 0.50000  | 0.75000                 | 0.05066  |  |
| O3             | 0.25000  | 0.04900                             | 0.25000  | 0.25000  | 0.03246                 | 0.25000  |  |
| O4             | 0.25000  | 0.95100                             | 0.75000  | 0.25000  | 0.96754                 | 0.75000  |  |
| O5             | 0.00000  | 0.75000                             | 0.42130  | 0.00000  | 0.75000                 | 0.44934  |  |
| O6             | 0.75000  | 0.54900                             | 0.75000  | 0.75000  | 0.53246                 | 0.75000  |  |
| O7             | 0.75000  | 0.45100                             | 0.25000  | 0.75000  | 0.46754                 | 0.25000  |  |
| O8             | 0.50000  | 0.25000                             | 0.92130  | 0.50000  | 0.25000                 | 0.94934  |  |
| N1             | 0.75000  | 0.03720                             | 0.25000  | 0.75000  | 0.03246                 | 0.25000  |  |
| N2             | 0.25000  | 0.46280                             | 0.25000  | 0.25000  | 0.46754                 | 0.25000  |  |
| N3             | 0.75000  | 0.96280                             | 0.75000  | 0.75000  | 0.96754                 | 0.75000  |  |
| N4             | 0.25000  | 0.53720                             | 0.75000  | 0.25000  | 0.53246                 | 0.75000  |  |

**Supporting Information**

**Authors: Masatomo Yashima, Mio Saito, Hiromi Nakano, Tsuyoshi Takata, Kiyonori Ogisu, Kazunari Domen**

**Title: Imma Perovskite-Type Oxynitride  $\text{LaTiO}_2\text{N}$ , Structure and Electron Density**

**(S12) Figure S8. Band structure of  $(\text{LaTiO}_2\text{N})_4$ .** These curves were obtained by the DFT calculations for the 4<sup>th</sup> structure model (Fig. S7(d)).

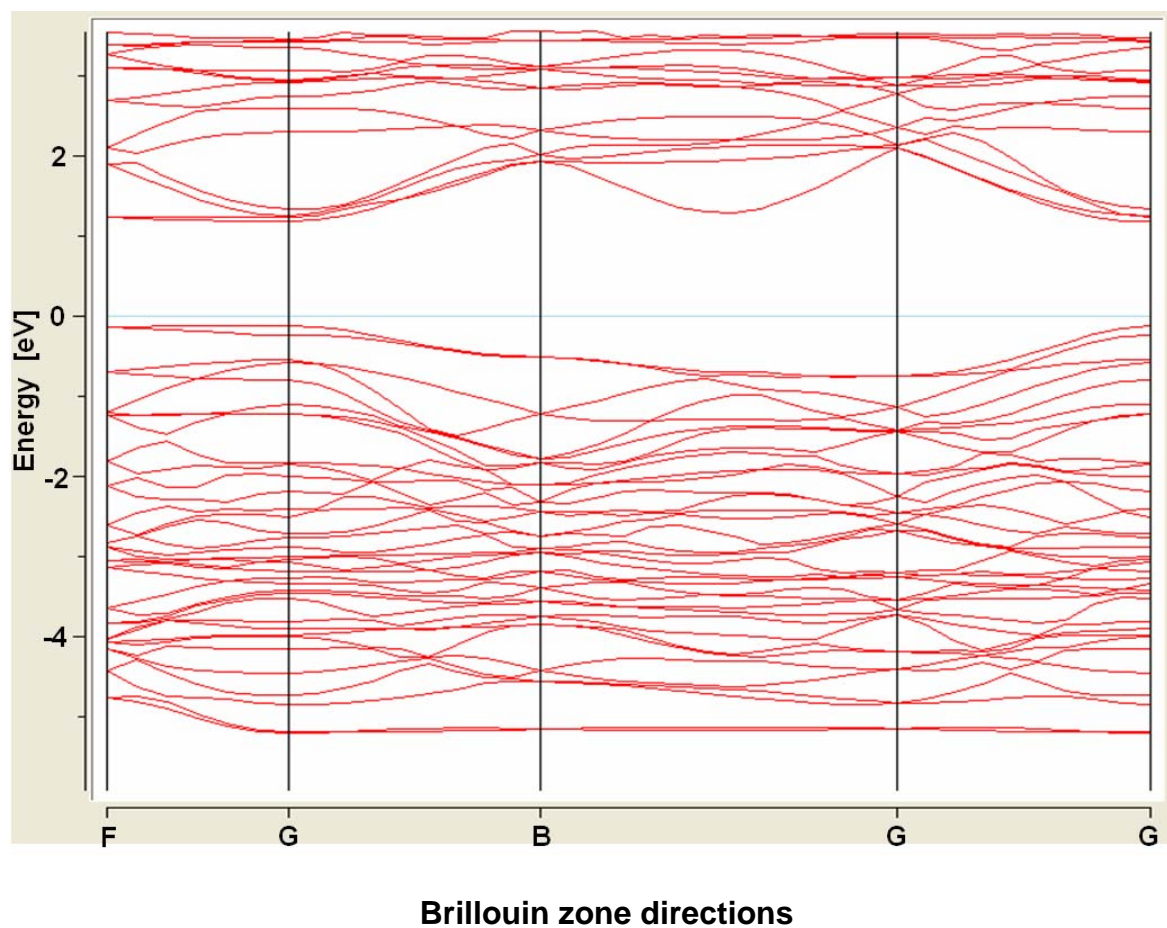

End of the Supporting Information
